# Supplementary material for: Geriatric Patient-Aligned Care Teams in Department of Veterans Affairs: How Are They Structured?
Source: MDPI journal article supplement (doi:10.3390/geriatrics3030046), 2018-08-01
Supplement: s1 [file s1]

## How VA Provides Care to Veterans in GeriPACT: A Survey of GeriPACT Physician Leaders

How would you describe the structure of your GeriPACT team?

- ☐ Providers are assigned a separate panel of GeriPACT patients and each panel has its own distinct GeriPACT core team members (e.g., social worker, nurse care manager, pharmacist).
- ☐ Providers are assigned a separate panel of GeriPACT patients and each panel shares core GeriPACT team members (e.g., social worker, nurse care manager, pharmacist).
- ☐ Providers share a panel of GeriPACT patients and the panel has its own distinct GeriPACT core team members (e.g., social worker, nurse care manager, pharmacist).
- ☐ Other Specify: \_\_\_\_\_

What type of dedicated space does your GeriPACT have to see patients?

- ☐ We do not have dedicated space and share space with other clinics
- ☐ We have dedicated space co-located within PACT  
If yes: How many dedicated rooms do you have to see patients? \_\_\_\_\_
- ☐ We have dedicated space co-located in Geriatrics specialty care  
If yes: How many dedicated rooms do you have to see patients? \_\_\_\_\_

A GeriPACT teamlet is a primary care team that generally consists of a **core team**, which may include a provider (Physician, Advance Practice Nurse (APN), Physician Assistant (PA)), Residents in training, Registered Nurse (RN) Care Manager, Clinical Associate (Licensed Practical Nurse (LPN) or Medical Assistant/Health Technician), Social Worker, Clinical pharmacist, and an Administrative Associate (Clerk/Health Technician).

An **extended team member** of GeriPACT is a health care professional designated to a GeriPACT/PACT position in Primary Care Management Module (PCMM) who provides direct discipline-specific patient care to one or more panels of patients, but not to all primary care patients at the facility. *Examples of extended team members are:* Registered Dietitians and Primary Care-Mental Health Integration staff.

Which disciplines participate in the GeriPACT core and extended team?

- |                                                                              |                                                                |
|------------------------------------------------------------------------------|----------------------------------------------------------------|
| <input type="checkbox"/> Audiologist                                         | <input type="checkbox"/> Nurse Practitioner                    |
| <input type="checkbox"/> Chaplain                                            | <input type="checkbox"/> Occupational Therapist/OT Aide        |
| <input type="checkbox"/> Clerical Associate/Receptionist (e.g., MSA)         | <input type="checkbox"/> Physical Therapist/ PT Aide           |
| <input type="checkbox"/> Clinical Pharmacist/ Clinical Pharmacist Specialist | <input type="checkbox"/> Physician Assistant                   |
| <input type="checkbox"/> Clinical RN Specialist                              | <input type="checkbox"/> Physician/Geriatrician (e.g., MD, DO) |
| <input type="checkbox"/> Dentist/Dentist Auxiliary                           | <input type="checkbox"/> Psychiatrist/Geropsychiatrist         |
| <input type="checkbox"/> Dietician                                           | <input type="checkbox"/> Psychologist                          |
| <input type="checkbox"/> Health Administrator                                | <input type="checkbox"/> RN (e.g., Nurse Case Manager)         |
| <input type="checkbox"/> Kinesiotherapist/KT Aide                            | <input type="checkbox"/> Social Worker                         |
| <input type="checkbox"/> Licensed Practical Nurse                            | <input type="checkbox"/> Speech or Language Pathologist        |
| <input type="checkbox"/> Nurse Aide                                          | <input type="checkbox"/> Other Specify: _____                  |

Enter the assigned GeriPACT FTEE each of GeriPACT core and extended team members.

|                      | FTEE (0-1) |
|----------------------|------------|
| [insert disciplines] |            |

What is the maximum panel size of your GeriPACT in Fiscal Year (FY) 2016? (i.e., the largest number of patients in panel you can accommodate)

\_\_\_\_\_

Through which of these processes are patients assigned to the GeriPACT panel?

Choose all that apply.

- ☐ Only Newly Enrolled patients to VA: Age based enrollment
- ☐ Only Newly Enrolled patients to VA: Condition focused enrollment
- ☐ Current PACT patients: Age based enrollment
- ☐ Current PACT patients: Condition focused enrollment
- ☐ By PACT referral
- ☐ By patient request

Which conditions or concerns are managed by the GeriPACT team? Choose all that apply.

|                                                                                       | Yes                      | No                       |
|---------------------------------------------------------------------------------------|--------------------------|--------------------------|
| Advanced age                                                                          | <input type="checkbox"/> | <input type="checkbox"/> |
| Multiple medical and functional concerns                                              | <input type="checkbox"/> | <input type="checkbox"/> |
| Psychosocial concerns                                                                 | <input type="checkbox"/> | <input type="checkbox"/> |
| Failure to thrive                                                                     | <input type="checkbox"/> | <input type="checkbox"/> |
| Frailty                                                                               | <input type="checkbox"/> | <input type="checkbox"/> |
| Delirium                                                                              | <input type="checkbox"/> | <input type="checkbox"/> |
| Falls                                                                                 | <input type="checkbox"/> | <input type="checkbox"/> |
| Disorders of gait and balance                                                         | <input type="checkbox"/> | <input type="checkbox"/> |
| Incontinence of bowel and bladder                                                     | <input type="checkbox"/> | <input type="checkbox"/> |
| Dementia and other causes of impaired cognition                                       | <input type="checkbox"/> | <input type="checkbox"/> |
| Depression                                                                            | <input type="checkbox"/> | <input type="checkbox"/> |
| Documentation of suboptimal outcomes in PACT (high utilization)                       | <input type="checkbox"/> | <input type="checkbox"/> |
| Elder abuse / neglect                                                                 | <input type="checkbox"/> | <input type="checkbox"/> |
| Risk for institutional placement or concern about independence in living arrangements | <input type="checkbox"/> | <input type="checkbox"/> |
| Impending disability                                                                  | <input type="checkbox"/> | <input type="checkbox"/> |
| Other: Specify: _____                                                                 | <input type="checkbox"/> | <input type="checkbox"/> |

|                                                                                                                                                                                                                                  | Yes                      | No                       |
|----------------------------------------------------------------------------------------------------------------------------------------------------------------------------------------------------------------------------------|--------------------------|--------------------------|
| Do you report the procedure code for Comprehensive Geriatric Evaluation (i.e., S0250) as part of the activity of this GeriPACT?                                                                                                  | <input type="checkbox"/> | <input type="checkbox"/> |
| Does your VAMC have a written collaborative service agreement between PACT and GeriPACT concerning proposed transfer of patients?                                                                                                | <input type="checkbox"/> | <input type="checkbox"/> |
| Do you have a specified person(s) (e.g. case manager) in your clinic, other than a physician, NP, or PA, who works to arrange and coordinate care across specialties and with providers other than those in the GeriPACT clinic? | <input type="checkbox"/> | <input type="checkbox"/> |
| Do you have designated educators, other than a physician, NP, or PA, available in your clinic to teach patients how to self-manage their illnesses and medication regimens?                                                      | <input type="checkbox"/> | <input type="checkbox"/> |

|                                                                                                                                                                                                             | Most                     | Some                     | A Few                    | None                     |
|-------------------------------------------------------------------------------------------------------------------------------------------------------------------------------------------------------------|--------------------------|--------------------------|--------------------------|--------------------------|
| How many GeriPACT team members are certified /boarded within their disciplines?                                                                                                                             | <input type="checkbox"/> | <input type="checkbox"/> | <input type="checkbox"/> | <input type="checkbox"/> |
| Other than those above, do you have team members with advanced formal training in their discipline (e.g., curriculum in geriatric education center, a one month or longer clinical mentored preceptorship)? | <input type="checkbox"/> | <input type="checkbox"/> | <input type="checkbox"/> | <input type="checkbox"/> |
